# Supplementary material for: MafA and MafB Regulate Pdx1 Transcription through the Area II Control Region in Pancreatic β Cells
Source: PubMed Central journal article supplement — J Biol Chem. 2008 Aug 15;283(33):22612–9. doi: 10.1074/jbc.M802902200 (PMC2504898; doi:10.1074/jbc.m802902200), 2008-08-15
Supplement: M802902200_1.pdf [file M802902200_1.pdf]

Supplemental Figure 1. *Pdx1<sup>AlIII</sup>-LacZ* is expressed in few E18.5 insulin<sup>+</sup> cells of *MafB*<sup>-/-</sup> mice. Confocal images of E18.5 pancreata from *Pdx1<sup>AlIII</sup>-LacZ;MafB<sup>+/+</sup>* (top row) and *Pdx1<sup>AlIII</sup>-LacZ;MafB<sup>-/-</sup>* (bottom row) costained for insulin (red),  $\beta$ gal (green), and a nuclear stain (blue).

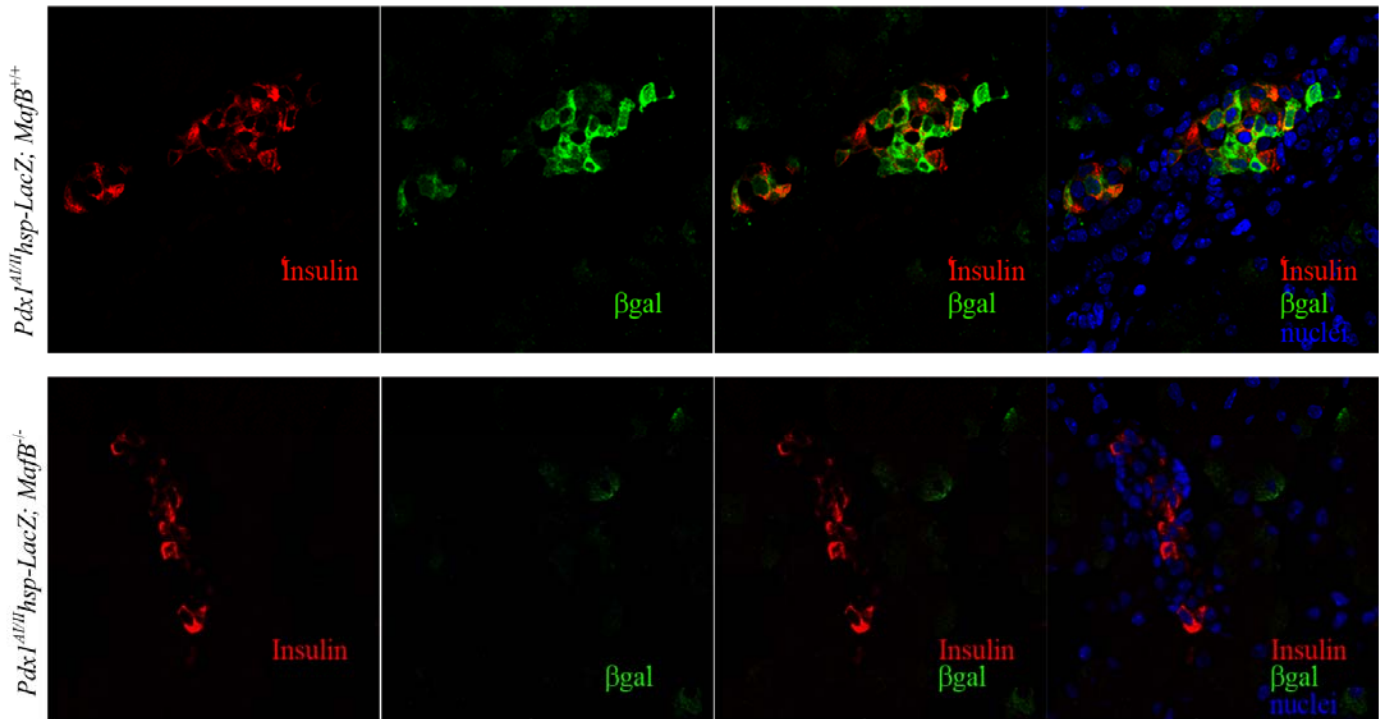

Supplemental Table 1. The commercially generated (IDT, Coralville, IA) probe and competitor sequences labeled by the 5' gene location. Linker sequences are in italics, base pairs that were mutated are underlined, and mouse and human sequence is denoted with (m) and (hu).

| gel shift oligos                     | sequence                                                  |
|--------------------------------------|-----------------------------------------------------------|
| mB2 (-2124/-2104)                    | <i>GCC</i> TTTCTGCTGAGAAACCCTTTTAGGG                      |
| huB2 (?)                             | <i>GGC</i> TTTCTGCTGAGAGCCTCTTTTACCG                      |
| mB4/5 (-2103/-2083)                  | <i>GGGG</i> CTTTTTGCAAAGCACAGCAAAGGC                      |
| rat <i>Insulin</i> II C1 (-125/-101) | <i>CCGGAA</i> ACTGCAGCTTCAGCCCCTCTGG                      |
| mAI -2756                            | GACAGAGTCTCAGCAGAAGTGGAAGGAAGAGAGGAGGC                    |
| mAI -2728                            | GAGAGGAGGCAGGGTACCTCCAGTATCAGGGAGGACTATCAG                |
| mAI -2698                            | GAGGACTATCAGGACGTCCTGCTAATAAAAAGACTTTTTCACTGTCC           |
| mAI -2660                            | CACTGTCCACAGTATAATTGGTTTACAGCCGTTTTTGTTTATTTATCC          |
| mAI -2624                            | GTTTATTTATCCATAAGAGCTGCTGTTAAATGGCTCGGGAAGG               |
| mAI -2588                            | GGGAAGGCTCTTGCCTAATGGCTGGGTATCTCAGAGGCCTTCTGG             |
| mAI -2552                            | GCCTTCTGGAGGCAGAGGAGGGCACAGGCGGCCTGGATTCAGAGCGG           |
| mAI -2513                            | CAGAGCGGAAATGCGTATCACCCATAATGGATTTAGCCACCTGATGG           |
| mAI -2474                            | CCTGATGGTGCTGGGAGCCAGAGAGGCAGAGAAAGAACCAAATCCTTCC         |
| mAII -2196                           | CCTTCCCTCAAGTTTTTIGCTCATCCTGTGAGAATTTATTTATTTGTTTC        |
| mAII -2159                           | TTTATTTGTTTCCTGTGAAAAGCAGCGAGCTTGTTTTTC                   |
| mAII -2124                           | <i>GCC</i> TTTCTGCTGAGAAACCCTTTTCTTTTTGCAAAGCACAGCAAAGGC  |
| mAII -2089                           | <i>CC</i> CAGCAAAAATATTTAAATGGGAATAAATGAAGCGTCGAGATGGAGGC |
| mAII -2059                           | GCGTCGAGATGGAAGCCAATTTACCAAAAATGCATGCAATTAGACCG           |
| mAII -2029                           | CGCATGCAATTAGACCAGAAGIGCTAAGCAAACATCCTGGGGTGTGGG          |
| mAII -1995                           | CCCTGGGGTGTGGGTTAGGCAGGCTGCTCAGGGGTGGGGCTCGC              |
| mAII -1959                           | GGCTCGAGGGAACAGCAGGGGGTCTATCCCTAAGGGG                     |

Supplemental Table 2. Mouse primer sets were generated with ABI software and used for quantitative ChIP analysis.

| Primer set               | primer 1 (forward)        | primer 2 (reverse)           |
|--------------------------|---------------------------|------------------------------|
| AI (-2763/-2686)         | CTGGGACAGAGTCTCAGCAGAA    | CGTCCTGATAGTCCTCCCTGAT       |
| AII (-2091/-2007)        | GCACAGCAAAAATATTAATGGGAAT | CACTTCTGGTCTAATTGCATGCA      |
| AIII (-1822/-1755)       | TCAACACCTTGCCGCTGAT       | CGCGAGTGGCCATATCG            |
| AIV (-5992/-5912)        | GGCCCAGCACTTGCAAAT        | GATAAGGGAATGTTAAACTGGTTAACAA |
| <i>PEPCK</i> (-445/-366) | TTTGGCCGTGGGAGTGA         | GCTGGCTGCACATTTTGTGT         |
